# Supplementary material
Source: PubMed Central journal article supplement (PMC3040903)
Supplement: supp_jn.110.133603_nut133603_T01.pdf [file supp_jn.110.133603_nut133603_T01.pdf]

ONLINE SUPPORTING MATERIAL

**Supplemental Table 1: Spearman rank correlation coefficients (rho) among the sub-components of the AHA-DLS in the Boston Puerto Rican Health Study**

| AHA-DLS components                  | AHA-DLS components |                   |                          |                                     |              |       |               |                  |                     |                            |              |        |         |
|-------------------------------------|--------------------|-------------------|--------------------------|-------------------------------------|--------------|-------|---------------|------------------|---------------------|----------------------------|--------------|--------|---------|
|                                     | BMI                | Physical activity | Fruit & vegetable intake | Variety in fruit & vegetable intake | Whole grains | Fish  | Saturated fat | <i>Trans</i> fat | Dietary cholesterol | % of energy from total fat | Added sugars | Sodium | Alcohol |
| BMI                                 |                    | 0.10*             | -0.08                    | -0.04                               | -0.03        | -0.08 | 0.05          | 0.03             | 0.03                | 0.04                       | -0.04        | 0.05   | 0.003   |
| Physical activity                   |                    |                   | 0.02                     | 0.05                                | -0.01        | 0.04  | 0.003         | 0.003            | -0.07               | -0.01                      | 0.003        | -0.05  | -0.01   |
| Fruit & vegetable intake            |                    |                   |                          | 0.30*                               | 0.14*        | 0.26* | 0.05          | 0.15*            | -0.24*              | -0.03                      | -0.14*       | -0.18* | 0.11*   |
| Variety in fruit & vegetable intake |                    |                   |                          |                                     | 0.24*        | 0.28* | -0.05         | 0.01             | -0.10*              | 0.02                       | -0.05        | -0.02  | 0.11*   |
| Whole grains                        |                    |                   |                          |                                     |              | 0.10* | 0.09*         | 0.09*            | 0.13*               | 0.06                       | 0.04         | 0.13*  | -0.02   |
| Fish                                |                    |                   |                          |                                     |              |       | -0.04         | -0.01            | -0.32*              | -0.05                      | -0.05        | -0.17* | 0.11*   |
| Saturated fat                       |                    |                   |                          |                                     |              |       |               | 0.51*            | 0.45*               | 0.39*                      | 0.04         | 0.21*  | -0.06   |
| <i>Trans</i> fat                    |                    |                   |                          |                                     |              |       |               |                  | 0.24*               | 0.19*                      | -0.02        | 0.09*  | -0.06   |
| Dietary cholesterol                 |                    |                   |                          |                                     |              |       |               |                  |                     | 0.20*                      | 0.20*        | 0.41*  | -0.16*  |
| % of energy from total fat          |                    |                   |                          |                                     |              |       |               |                  |                     |                            | -0.04        | 0.04   | -0.008  |
| Added sugars                        |                    |                   |                          |                                     |              |       |               |                  |                     |                            |              | 0.19*  | -0.11*  |
| Sodium                              |                    |                   |                          |                                     |              |       |               |                  |                     |                            |              |        | -0.08   |
| Alcohol                             |                    |                   |                          |                                     |              |       |               |                  |                     |                            |              |        |         |

\* $P \leq 0.004$  after Bonferroni adjustment for multiple comparisons
